# Supplementary material
Source: HighWire-hosted journal article supplement (http://www.qdcxjkg.com/highwire/filestream/113854/field_highwire_adjunct_files/0/ERJ_Figures_online_revised2_Final_Clean.pdf)

Figure S1

A. Characterizations of non-IPF control and IPF lung fibroblasts used in this study.

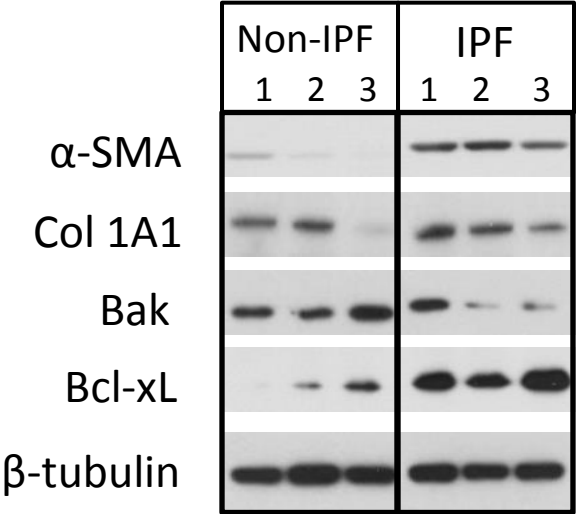



Figure S2.

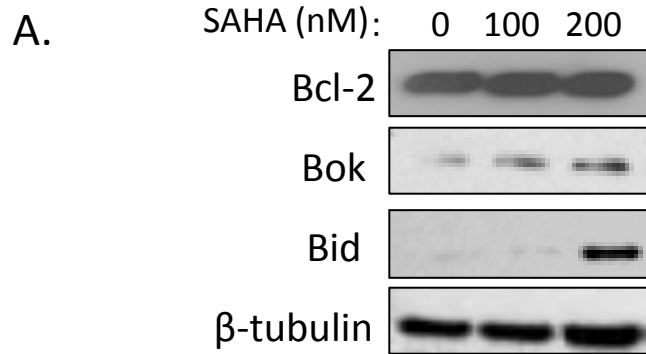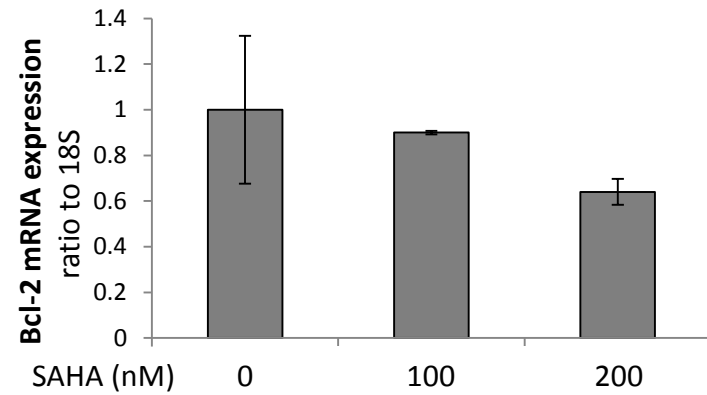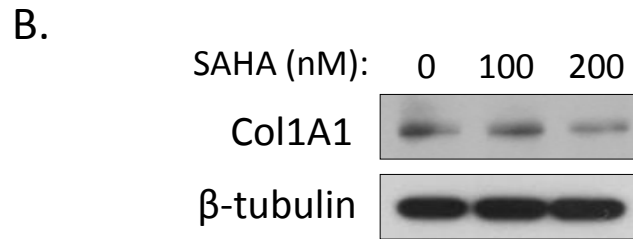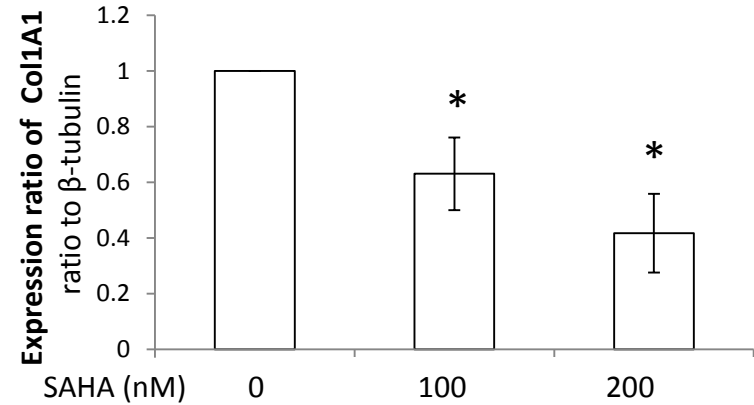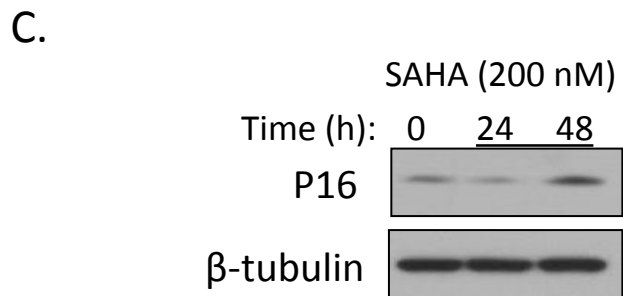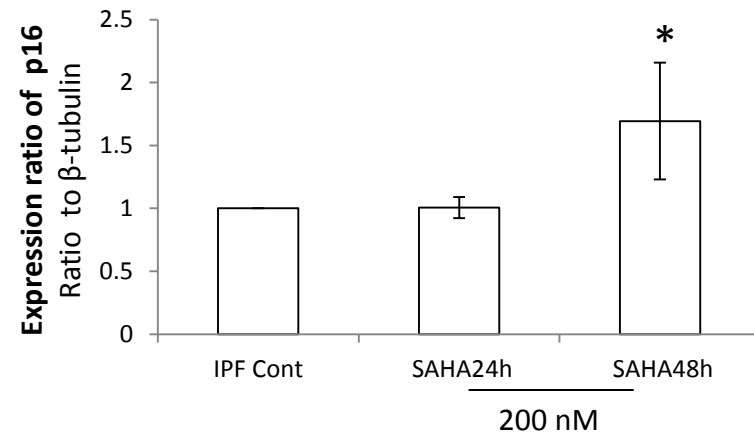

Figure S2.

D. Cell proliferation assay at 48h.

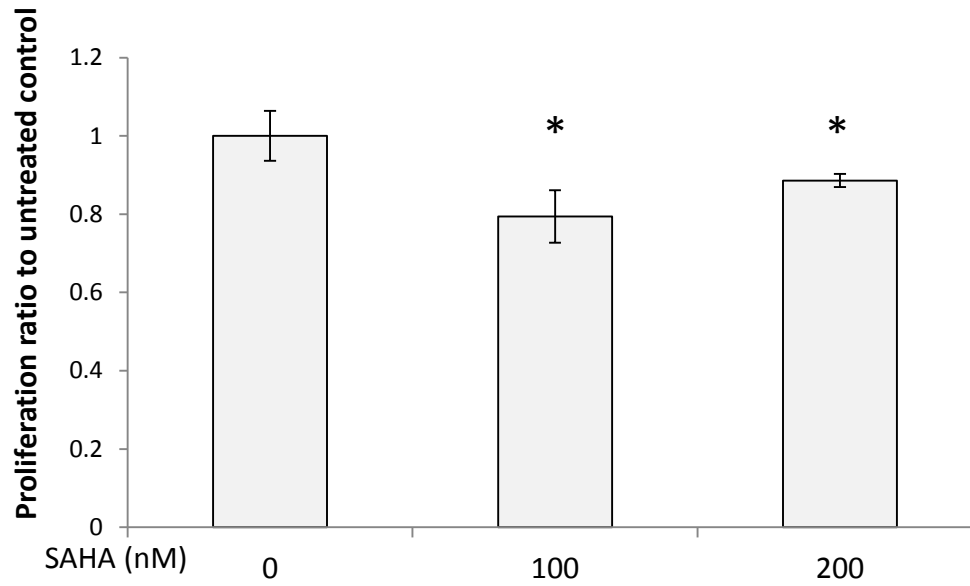

Figure S3

A: H&E

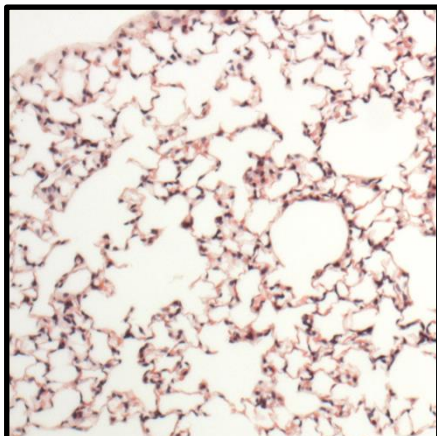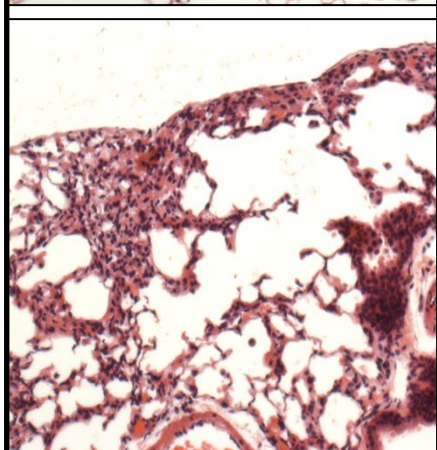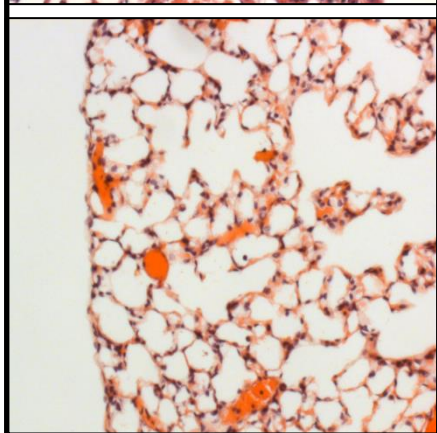

B: Trichrome

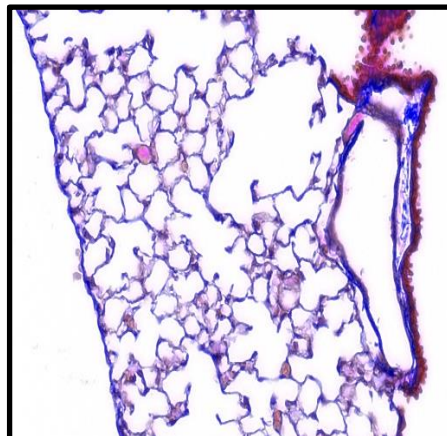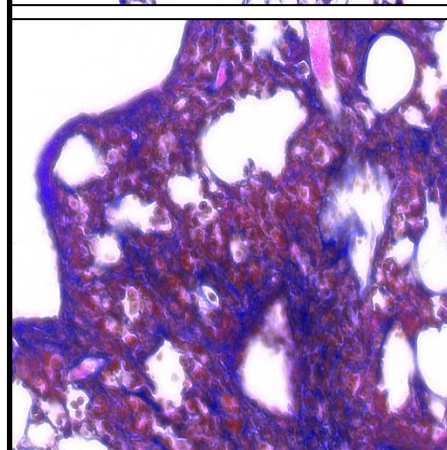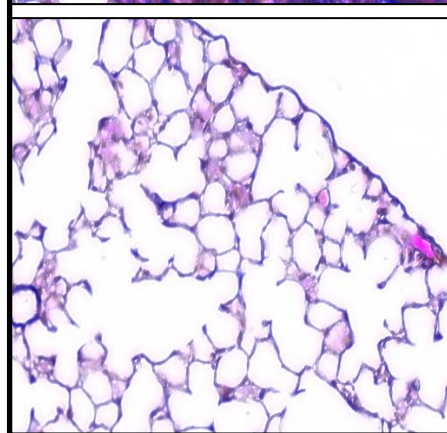

Saline

Bleo

Bleo/SAHA

C. Low magnification of lung, H&E stain  
Saline

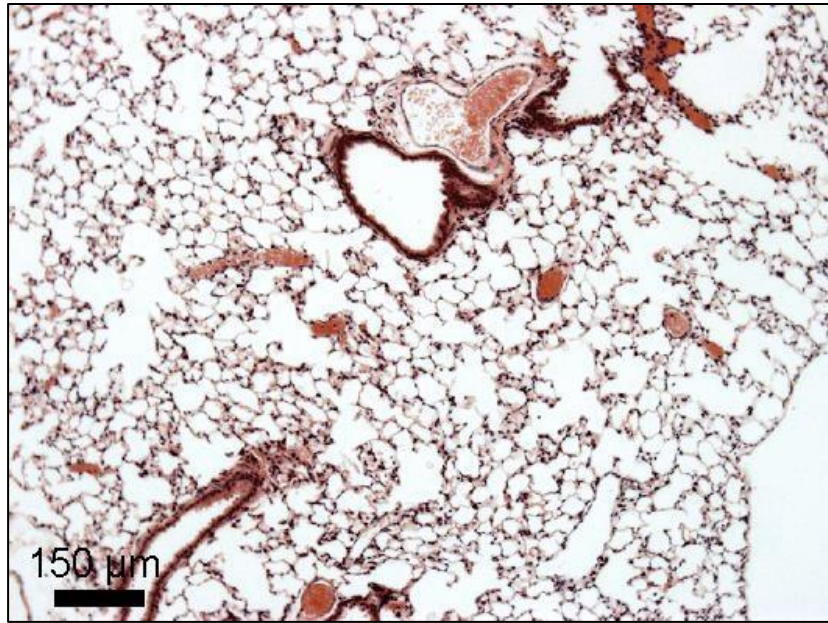

Bleo

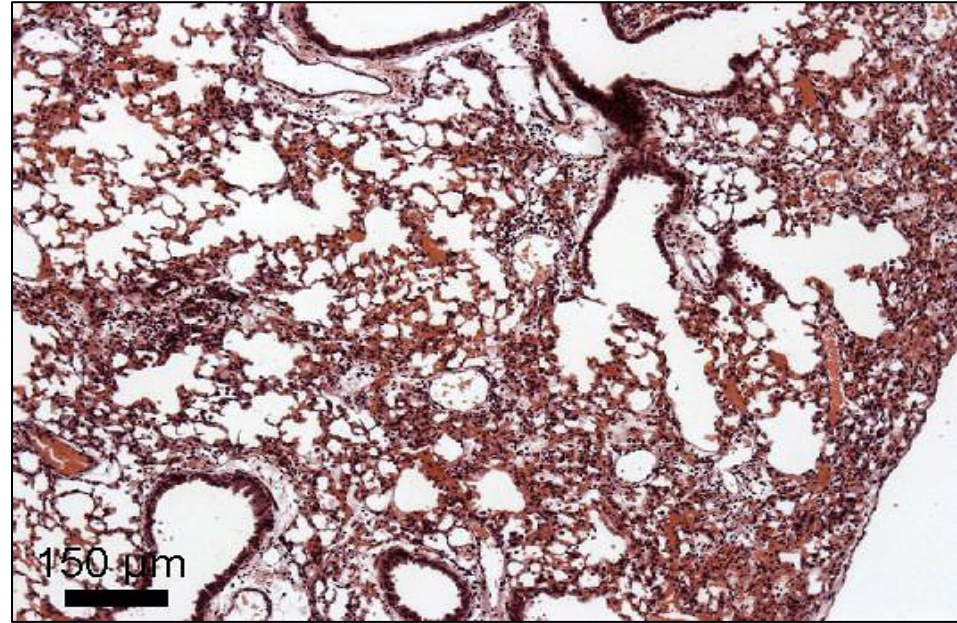

Bleo/SAHA

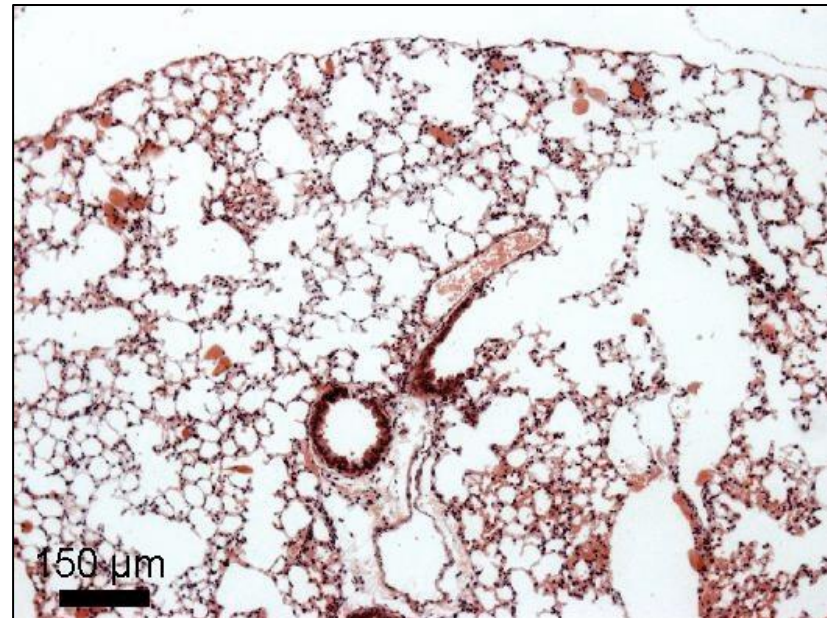

D. Low magnification of lung

IHC of collagen III (at 100x)

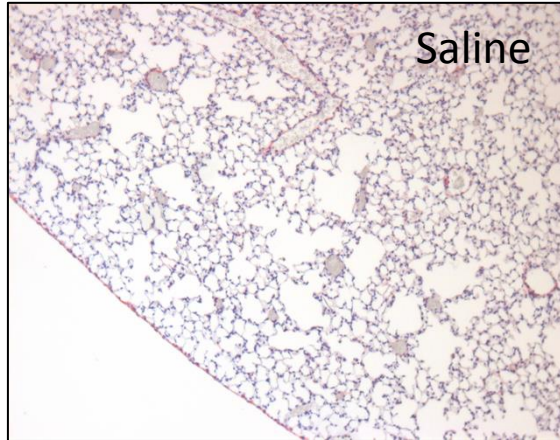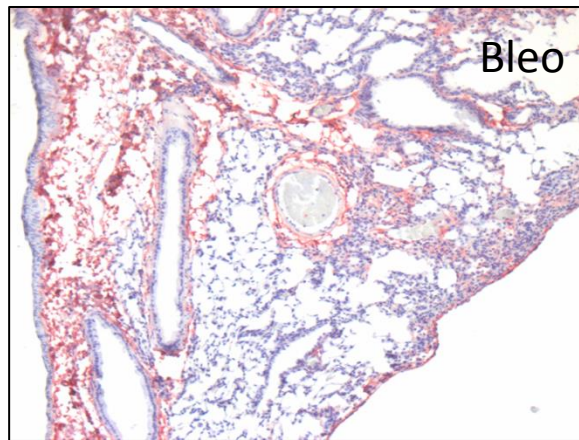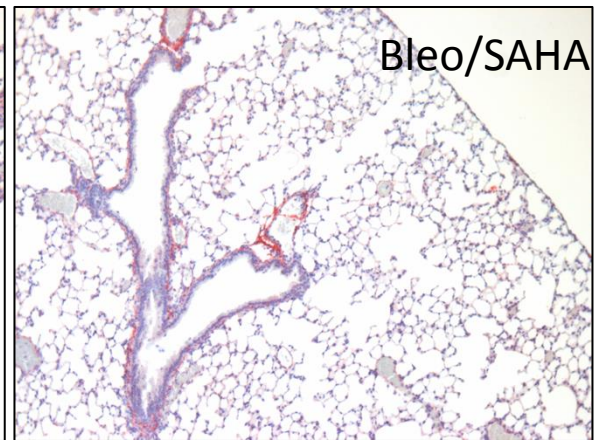

E.

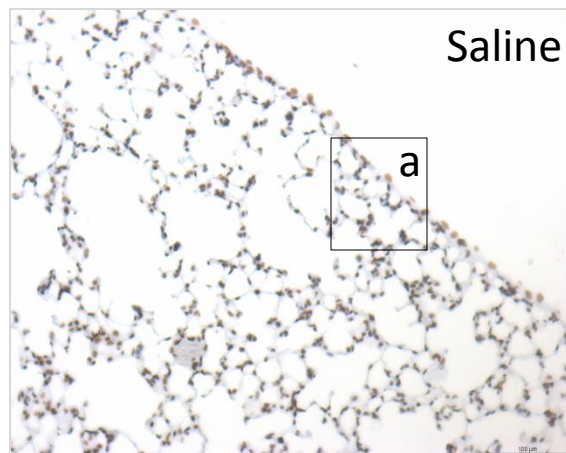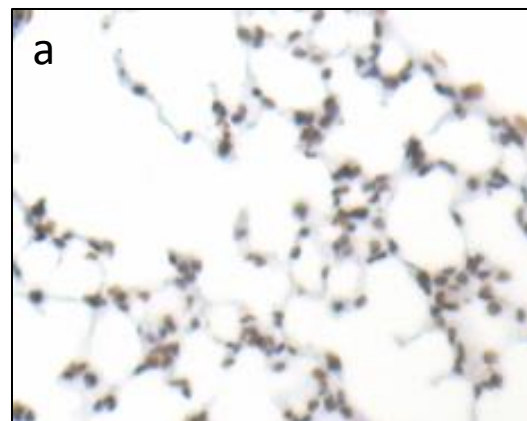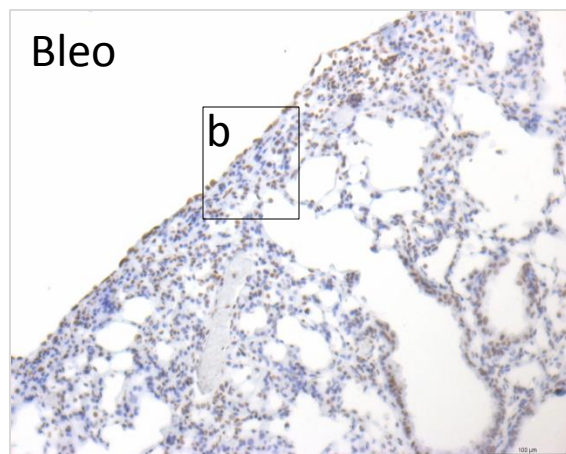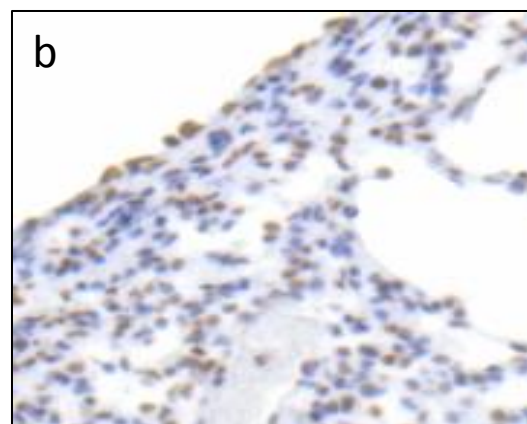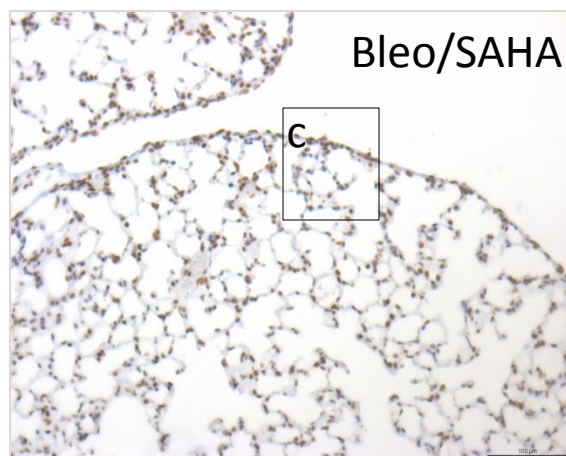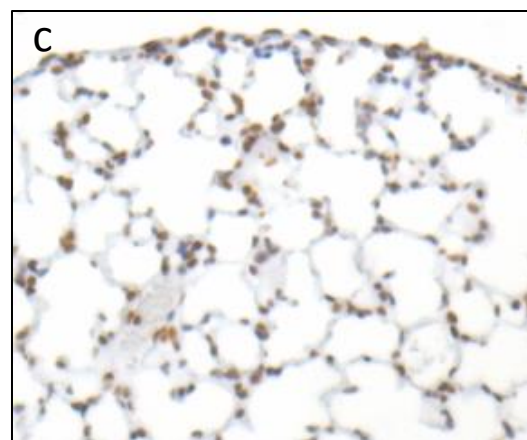



Figure S4

A.

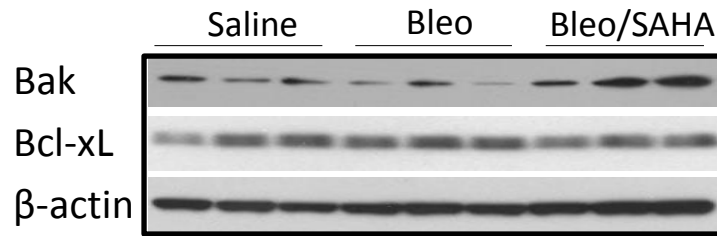

B.

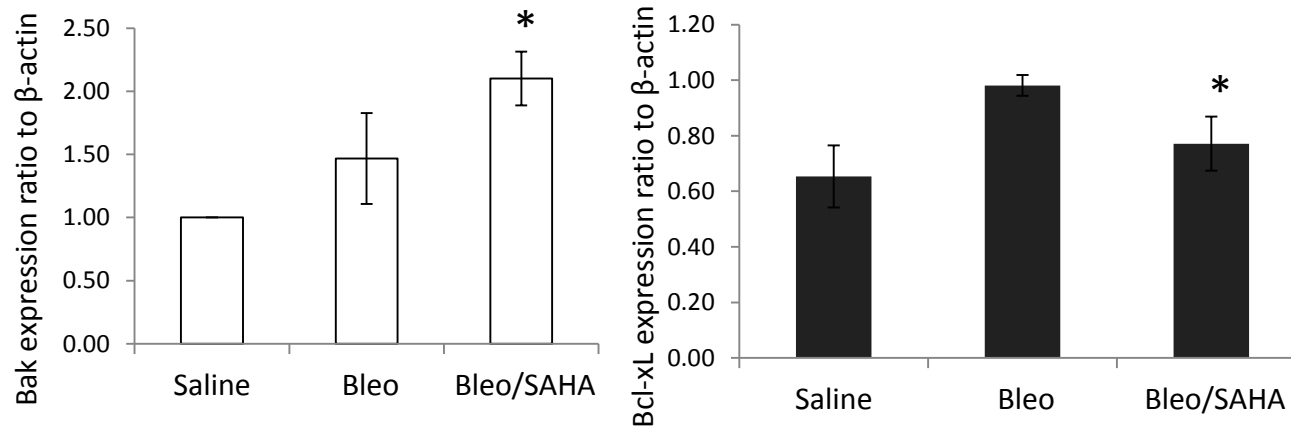

C.

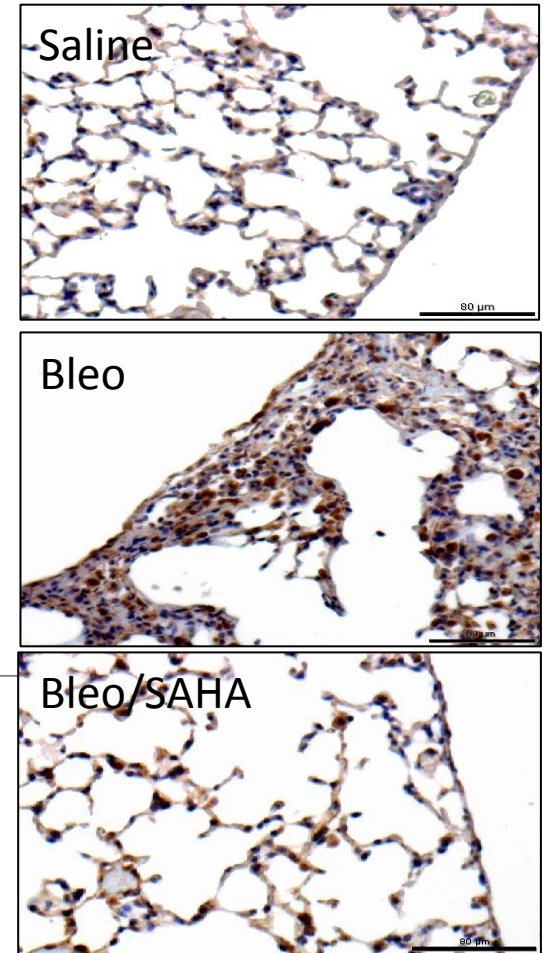

Supplement: ERJ_Figures_online_revised2_Final_Clean.pdf [file ERJ_Figures_online_revised2_Final_Clean.pdf]
